# Supplementary material for: Large mass field fluctuation and lattice anharmonicity effects promote thermoelectric and mechanical performances in NbFeSb half-Heusler alloys via Ti/Zr/Hf stepwise doping
Source: Royal Society of Chemistry journal article supplement (doi:10.1039/d3ta03613h), 2023-01-01
Supplement: d3ta03613h1.pdf [file d3ta03613h1.pdf]

## Electronic Supplementary Information

**Large mass field fluctuation and lattice anharmonicity effects promote thermoelectric and mechanical performances in NbFeSb half-Heusler alloys via Ti/Zr/Hf stepwise doping**

Chang Tan,<sup>a</sup> Hongxiang Wang,<sup>a</sup> Lingwen Zhao,<sup>a</sup> Yuqing Sun,<sup>a</sup> Jie Yao,<sup>a</sup> Jinze Zhai,<sup>a</sup>  
Chunlei Wang,<sup>a</sup> Hongchao Wang<sup>a\*</sup>

<sup>a</sup>School of Physics, State Key Laboratory of Crystal Materials, Shandong University,  
Jinan, 250100, PR China

\*Correspondence: wanghc@sdu.edu.cn (H. Wang)

## Supplementary Figures

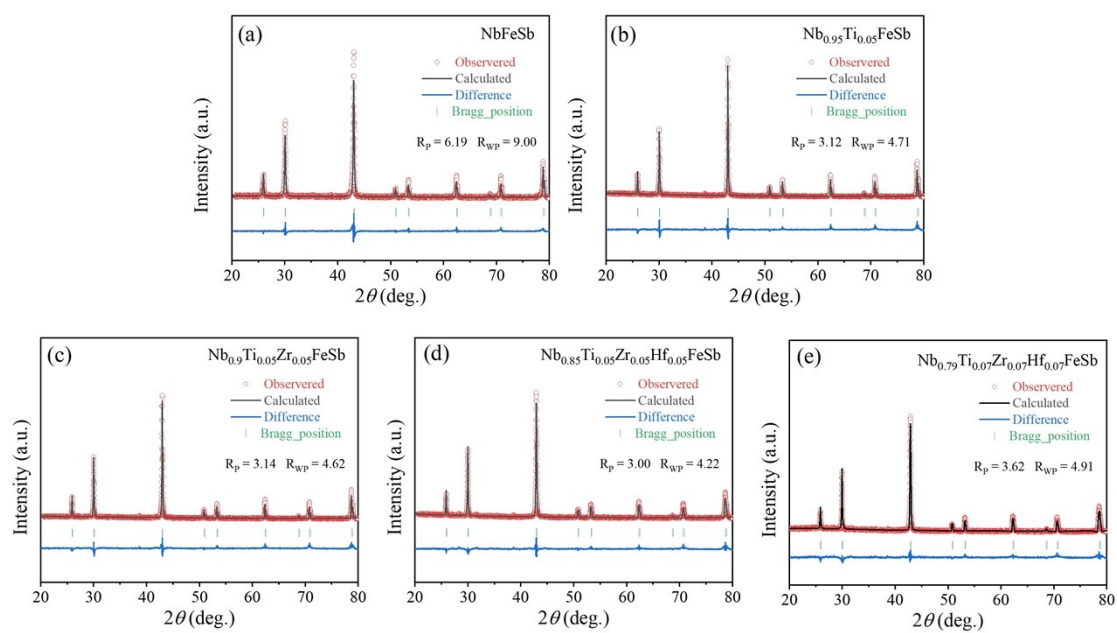

**Fig. S1.** Rietveld refinement result of the  $\text{Nb}_{1-x-y-z}\text{Ti}_x\text{Zr}_y\text{Hf}_z\text{FeSb}$  ( $x, y, z = 0, 0.05, 0.07$ ) sample.

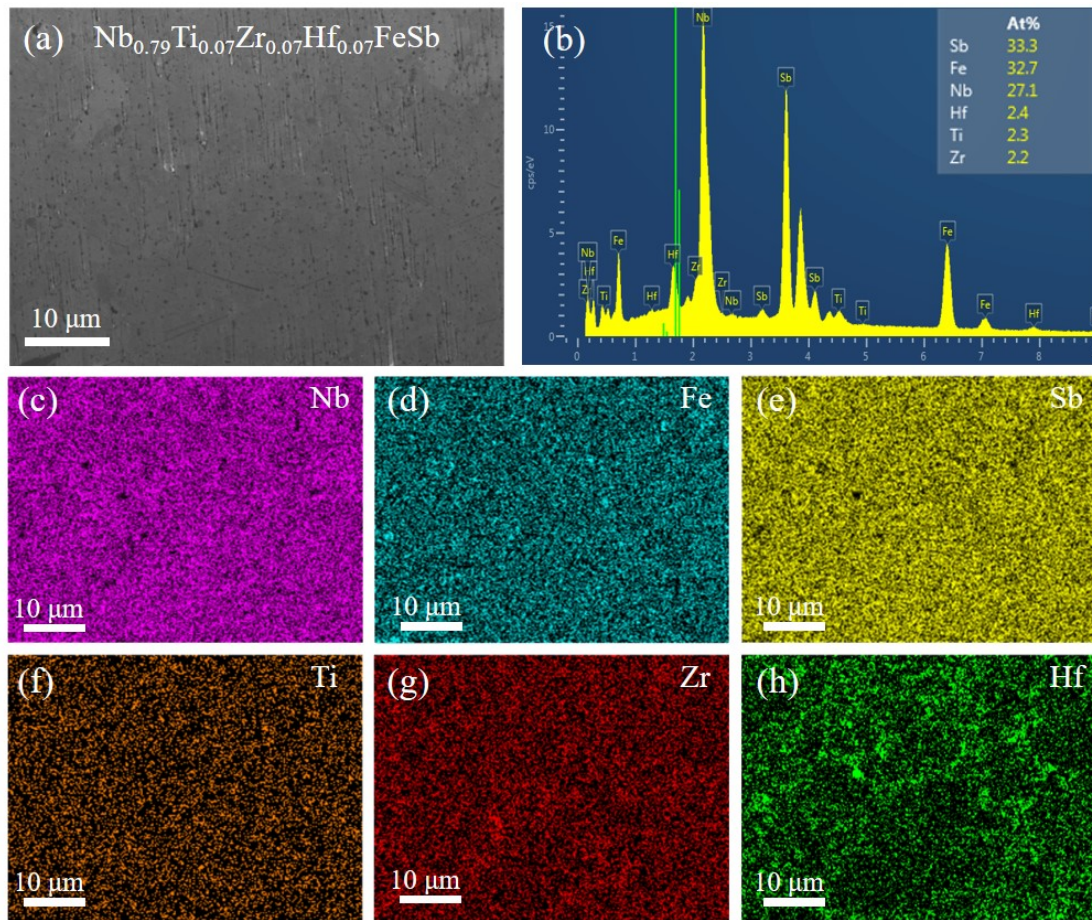

**Fig. S2.** (a) Scanning electron microscopy (SEM) image of a polished surface of the  $\text{Nb}_{0.79}\text{Ti}_{0.07}\text{Zr}_{0.07}\text{Hf}_{0.07}\text{FeSb}$  sample. (b) Corresponding energy dispersive spectrometry (EDS) and mappings of (c) Nb, (d) Fe, (e) Sb, (f) Ti, (g) Zr, (h) Hf.

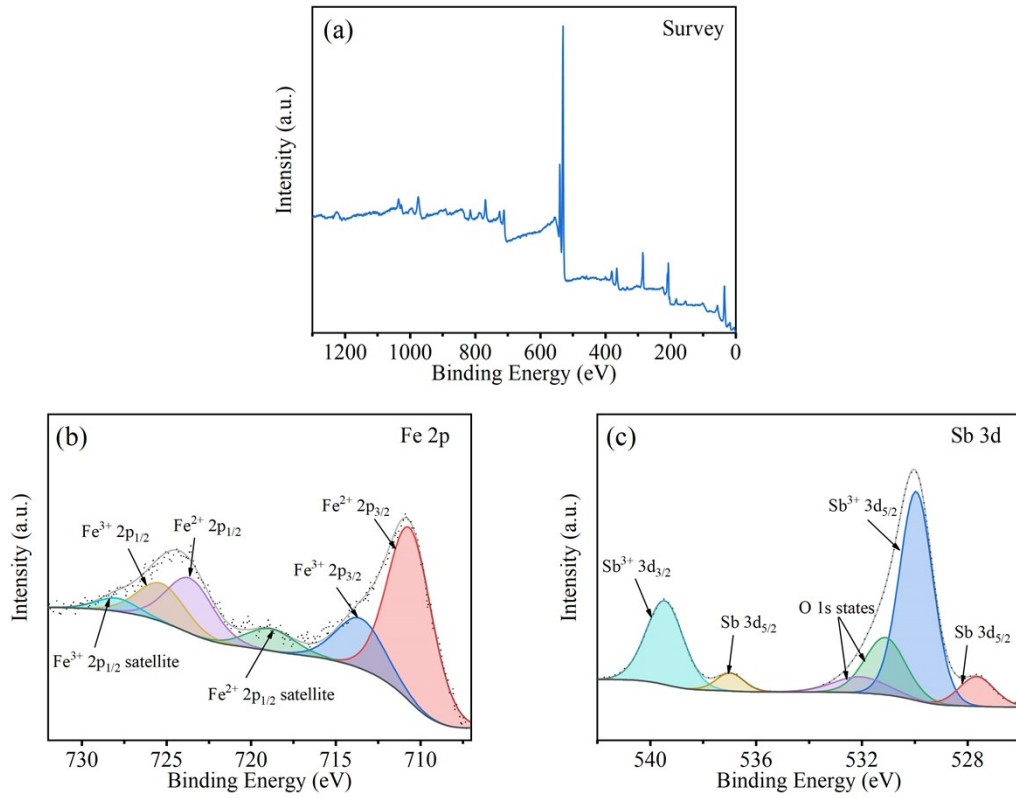

**Fig. S3.** X-ray photoelectron spectra (XPS) of the  $\text{Nb}_{0.82}\text{Ti}_{0.06}\text{Zr}_{0.06}\text{Hf}_{0.06}\text{FeSb}$  sample for (a) full spectrum, (b) Fe 2p, (c) Sb 3d.

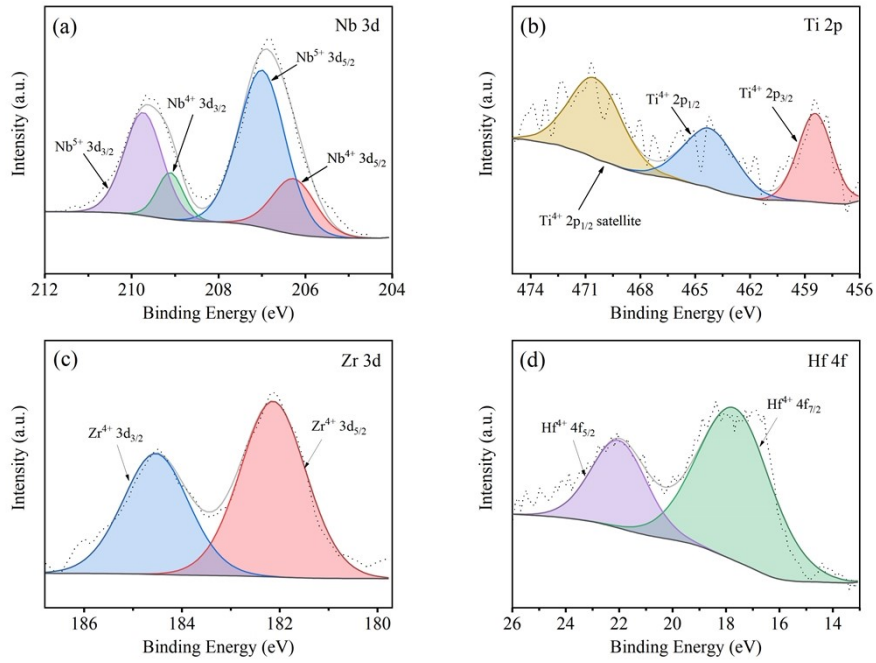

**Fig S4.** X-ray photoelectron spectra (XPS) of the  $\text{Nb}_{0.82}\text{Ti}_{0.06}\text{Zr}_{0.06}\text{Hf}_{0.06}\text{FeSb}$  sample for (a) Nb 3d, (b) Ti 2p, (c) Zr 3d, (d) Hf 4f.

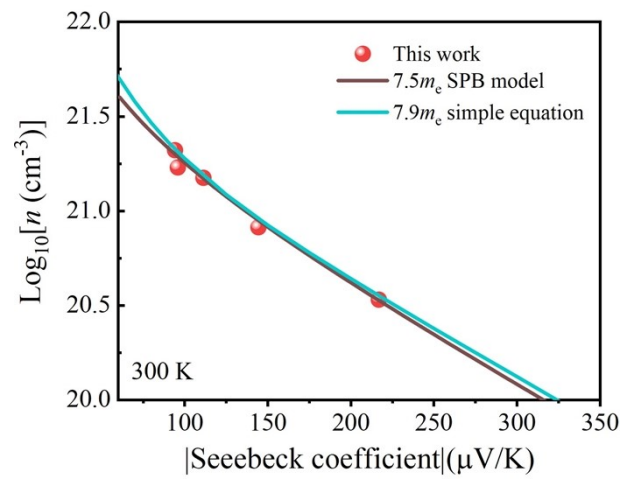

Fig. S5. The  $|S|$ -dependent  $\text{Log}_{10}(n)$  calculated by the simple Equation, the SPB model.

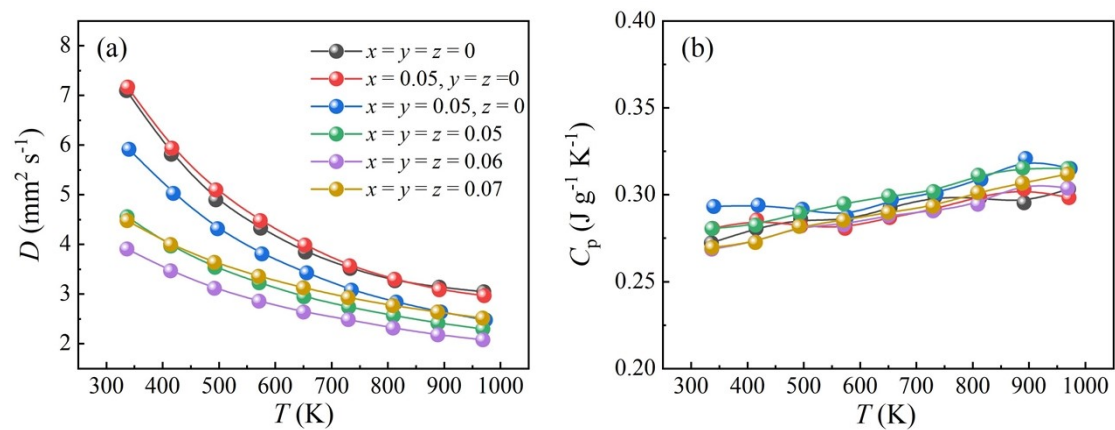

**Fig. S6.** Temperature-dependent (a) thermal diffusivity  $D$  and (b) heat capacity  $C_p$

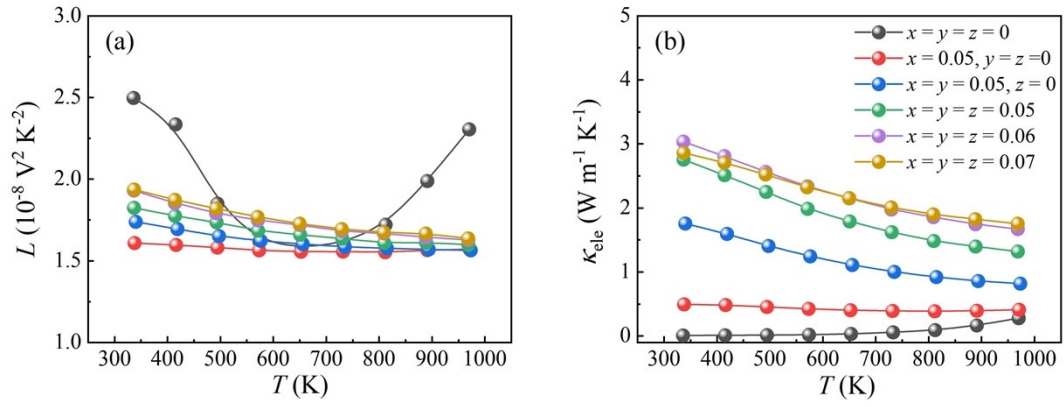

**Fig. S7.** (a) Calculated Lorentz number using the SPB model and (b) Electronic thermal conductivity for the  $\text{Nb}_{1-x-y-z}\text{Ti}_x\text{Zr}_y\text{Hf}_z\text{FeSb}$  ( $x, y, z = 0, 0.05, 0.06, 0.07$ ) samples.



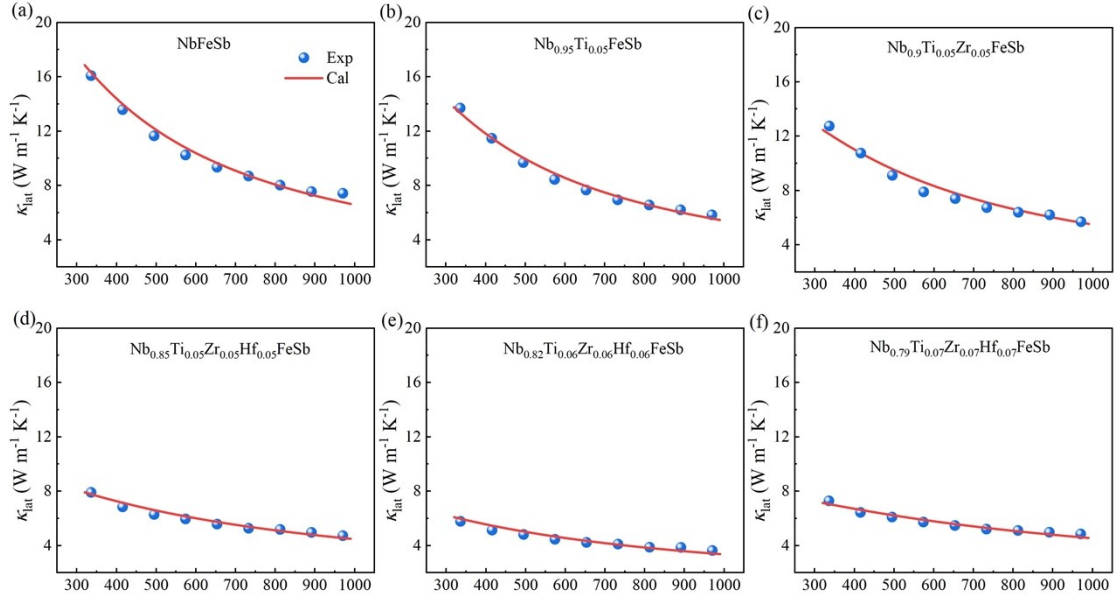

**Fig. S8.** The temperature dependence of lattice thermal conductivity of  $\text{Nb}_{1-x-y-z}\text{Ti}_x\text{Zr}_y\text{Hf}_z\text{FeSb}$  ( $x, y, z = 0, 0.05, 0.06, 0.07$ ) sample and fitting by Debye-Callaway model.

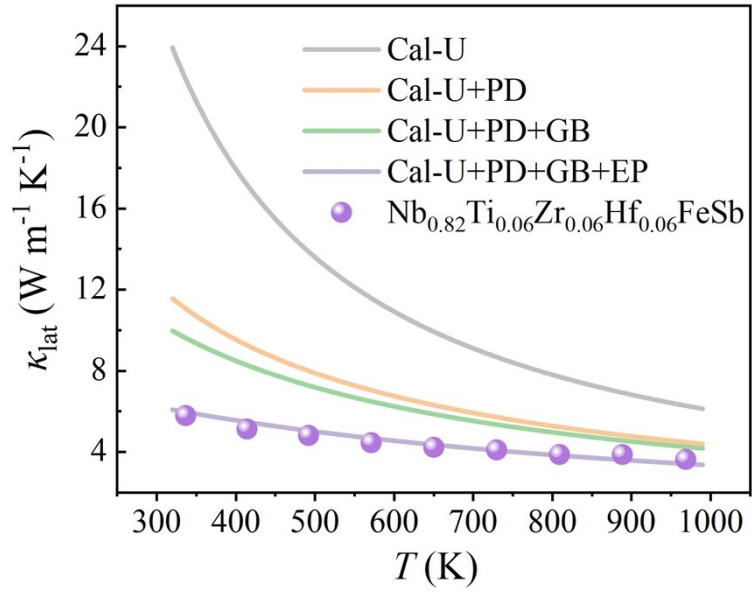

**Fig. S9.** Experimental and theoretical curves for  $\kappa_{\text{lat}}$  of the samples of  $x = y = z = 0.06$ .

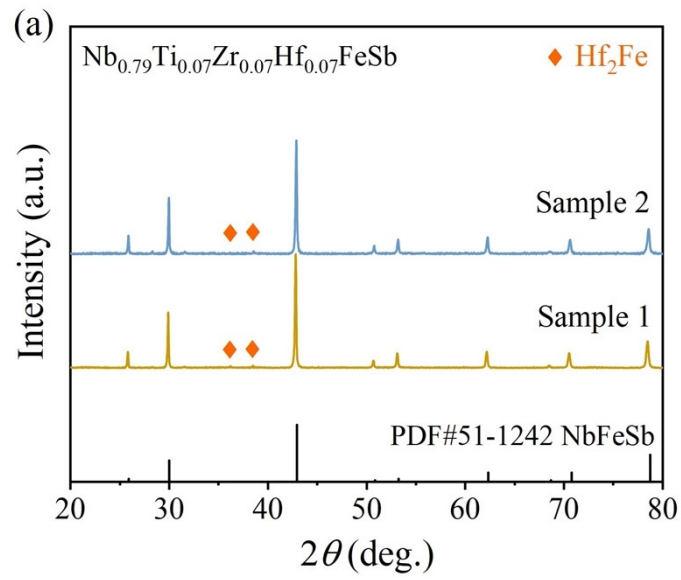

**Fig. S10.** Powder XRD patterns of  $\text{Nb}_{0.79}\text{Ti}_{0.07}\text{Zr}_{0.07}\text{Hf}_{0.07}\text{FeSb}$  sample 1 and 2.

## Supplementary Tables

**Table S1.** The mixing entropy, mixing enthalpy and mixing Gibbs free energy at 1123 K for the Nb<sub>1-x-y-z</sub>Ti<sub>x</sub>Zr<sub>y</sub>Hf<sub>z</sub>FeSb ( $x, y, z = 0, 0.05, 0.06, 0.07$ ) samples.

$x$ - $y$ - $z$  Ti <sub>$x$</sub> Zr <sub>$y$</sub> Hf <sub>$z$</sub> FeSb ( $x, y, z = 0, 0.05, 0.06, 0.07$ ) samples.

| $x, y, z$             | $\Delta S$ (J mol <sup>-1</sup> K <sup>-1</sup> ) | $\Delta H$ (KJ mol <sup>-1</sup> ) | $\Delta G$ (KJ mol <sup>-1</sup> ) |
|-----------------------|---------------------------------------------------|------------------------------------|------------------------------------|
| $x = y = z = 0$       | 0                                                 | 0                                  | 0                                  |
| $x = 0.05, y = z = 0$ | 1.65                                              | 0.38                               | -1.47                              |
| $x = y = 0.05, z = 0$ | 3.28                                              | 1.08                               | -2.60                              |
| $x = y = z = 0.05$    | 4.88                                              | 1.74                               | -3.74                              |
| $x = y = z = 0.06$    | 5.56                                              | 1.85                               | -4.40                              |
| $x = y = z = 0.07$    | 6.19                                              | 1.94                               | -5.01                              |

**Table S2.** The Rietveld refinement details of Nb<sub>1-x-y-z</sub>Ti<sub>x</sub>Zr<sub>y</sub>Hf<sub>z</sub>FeSb ( $x, y, z = 0, 0.05, 0.06, 0.07$ ) samples.

samples.

| $x, y, z$             | R <sub>p</sub> | R <sub>wp</sub> | $\chi^2$ | a (Å)  |
|-----------------------|----------------|-----------------|----------|--------|
| $x = y = z = 0$       | 6.19           | 9.00            | 4.06     | 5.9534 |
| $x = 0.05, y = z = 0$ | 3.12           | 4.71            | 4.72     | 5.9462 |
| $x = y = 0.05, z = 0$ | 3.14           | 4.62            | 4.44     | 5.9522 |
| $x = y = z = 0.05$    | 3.00           | 4.22            | 4.06     | 5.9578 |
| $x = y = z = 0.06$    | 2.80           | 3.81            | 2.83     | 5.9656 |
| $x = y = z = 0.07$    | 2.92           | 3.98            | 2.93     | 5.9677 |

**Table S3.** Actual and nominal composition of the Nb<sub>1-x-y-z</sub>Ti<sub>x</sub>Zr<sub>y</sub>Hf<sub>z</sub>FeSb ( $x, y, z = 0, 0.05, 0.06,$

0.07) samples.

| Nominal composition   | Actual composition                                                                                | SEM/EDS composition (at %) |     |     |     |      |      |
|-----------------------|---------------------------------------------------------------------------------------------------|----------------------------|-----|-----|-----|------|------|
|                       |                                                                                                   | Nb                         | Ti  | Zr  | Hf  | Fe   | Sb   |
| $x = y = z = 0$       | Nb <sub>1.02</sub> Fe <sub>0.98</sub> Sb                                                          | 34.3                       |     |     |     | 32.8 | 33.0 |
| $x = 0.05, y = z = 0$ | Nb <sub>0.97</sub> Ti <sub>0.05</sub> Fe <sub>0.98</sub> Sb <sub>0.99</sub>                       | 32.4                       | 1.7 |     |     | 32.8 | 33.0 |
| $x = y = 0.05, z = 0$ | Nb <sub>0.92</sub> Ti <sub>0.05</sub> Zr <sub>0.05</sub> Fe <sub>0.99</sub> Sb <sub>0.99</sub>    | 30.7                       | 1.6 | 1.8 |     | 33.1 | 32.9 |
| $x = y = z = 0.05$    | Nb <sub>0.88</sub> Ti <sub>0.05</sub> Zr <sub>0.05</sub> Hf <sub>0.05</sub> Fe <sub>0.96</sub> Sb | 29.6                       | 1.8 | 1.6 | 1.7 | 32.1 | 33.3 |
| $x = y = z = 0.06$    | Nb <sub>0.86</sub> Ti <sub>0.06</sub> Zr <sub>0.05</sub> Hf <sub>0.06</sub> Fe <sub>0.98</sub> Sb | 28.5                       | 1.9 | 1.8 | 2.1 | 32.6 | 33.1 |
| $x = y = z = 0.07$    | Nb <sub>0.81</sub> Ti <sub>0.07</sub> Zr <sub>0.07</sub> Hf <sub>0.07</sub> Fe <sub>0.98</sub> Sb | 27.1                       | 2.3 | 2.2 | 2.4 | 32.7 | 33.3 |

**Table S4.** The fitting parameters for the Nb<sub>1-x-y-z</sub>Ti<sub>x</sub>Zr<sub>y</sub>Hf<sub>z</sub>FeSb ( $x, y, z = 0, 0.05, 0.06, 0.07$ ) samples.

| Nominal composition   | $\varepsilon$ (G=0) | $A$<br>( $10^{-43}$ s <sup>3</sup> ) | $B$<br>( $10^{-18}$ s/K) | $C$<br>( $10^{-16}$ s) |
|-----------------------|---------------------|--------------------------------------|--------------------------|------------------------|
| $x = y = z = 0$       | 1.45                | 0                                    | 1.45                     | 2.50                   |
| $x = 0.05, y = z = 0$ | 30.7                | 1.01                                 | 1.80                     | 2.70                   |
| $x = y = 0.05, z = 0$ | 33.9                | 2.36                                 | 1.65                     | 3.00                   |
| $x = y = z = 0.05$    | 36.3                | 7.62                                 | 1.40                     | 3.20                   |
| $x = y = z = 0.06$    | 28.5                | 8.37                                 | 1.95                     | 3.60                   |
| $x = y = z = 0.07$    | 33.3                | 11.9                                 | 1.10                     | 4.00                   |

**Table S5.** The atom radius and mass of Nb, Ti, Zr, Hf element.

|                            | Nb    | Ti    | Zr    | Hf     |
|----------------------------|-------|-------|-------|--------|
| Radius (pm)                | 146   | 147   | 160   | 159    |
| Mass (g cm <sup>-1</sup> ) | 92.91 | 47.87 | 91.22 | 178.49 |

**Table S6.** The Young's modulus ( $E$ ) bulk modulus ( $K$ ), and compression modulus ( $E_s$ ) of the Nb<sub>1-x-y-</sub><sub>z</sub>Ti<sub>x</sub>Zr<sub>y</sub>Hf<sub>z</sub>FeSb ( $x, y, z = 0, 0.05, 0.06, 0.07$ ) samples.

| $x, y, z$             | $E$ (GPa) | $K$ (GPa) | $E_s$ (GPa) |
|-----------------------|-----------|-----------|-------------|
| $x = y = z = 0$       | 261.0     | 133.7     | 25.5        |
| $x = 0.05, y = z = 0$ | 293.0     | 157.7     | 38.4        |
| $x = y = 0.05, z = 0$ | 295.4     | 164.2     | 39.2        |
| $x = y = z = 0.05$    | 267.3     | 151.9     | 35.9        |
| $x = y = z = 0.06$    | 283.1     | 148.7     | 31.8        |
| $x = y = z = 0.07$    | 258.6     | 142.9     | 37.5        |

## Modeling of lattice thermal conductivity

Based on the Debye-Callaway theory, the  $\kappa_{\text{lat}}$  can be expressed as:

$$\kappa_L = \int_0^{\frac{\theta_D}{T}} \kappa_S(x) dx = \frac{k_B}{2\pi^2 v_a} \left( \frac{k_B}{\hbar} \right)^3 T^3 \int_0^{\frac{\theta_D}{T}} \tau(x) \frac{x^4 e^x}{(e^x - 1)^2} dx \quad (1)$$

where  $x = \hbar\omega/(k_B T)$  is the reduced phonon frequency,  $k_B, \hbar, \theta_D$  are the Boltzmann

constant, the reduced Planck constant, the Debye temperature, respectively.  $\tau$  is the sum of the relaxation times from different scattering mechanisms. Here, we mainly focus on the phonon-phonon Umklapp process (U), the point defect scattering (PD), the grain boundary scattering (GB) and the electro-acoustic coupling (EP).

In this work,  $\tau$  is expressed as:

$$\tau^{-1} = \tau_{PD}^{-1} + \tau_U^{-1} + \tau_{GB}^{-1} + \tau_{EP}^{-1} = A\omega^4 + B\omega^2 T \exp\left(-\frac{\theta_D}{3T}\right) + \frac{v}{d} + C\omega^2 \quad (2)$$

Where  $d$  is the grain size and  $v/d$  represents boundary scattering.  $A$  is the pre-factor of point defect (PD) scattering relaxation time due to Ti doping.  $B$  is the prefactor of phonon-phonon Umklapp (U) scattering relaxation time, and  $C$  is the prefactor of electron phonon (EP) scattering relaxation time. For the polycrystalline pure FeNbSb, the dominated phonon scattering mechanism should be the phonon-phonon  $U$  scattering and boundary scattering. Therefore, through fitting the  $\kappa_1$  of polycrystalline FeNbSb, we can obtain the prefactor  $B$  of  $U$  scattering relaxation time. Scattering by point defects arises from both mass and strain differences within the lattice.

In the simple case of alloying:

$$\tau_{PD}^{-1} = \frac{V\omega^4}{4\pi v_a^3} (\Gamma_m + \Gamma_s) \quad (3)$$

Where  $V$  is the volume per atom,  $v_a$  is the average velocity.  $\Gamma_m$  and  $\Gamma_s$  are the disorder scattering parameters of mass and strain field fluctuation, respectively. We can obtain the prefactor  $A$  of point defect (PD) scattering relaxation time, the mass fluctuation ( $\Gamma_m$ ) and strain field term ( $\Gamma_s$ ) parameter are then given by

$$\Gamma_m = \frac{\sum_{i=1}^n c_i \left( \frac{\bar{M}_i}{\bar{M}} \right)^2 f_i^1 f_i^2 \left( \frac{M_i^1 - M_i^2}{\bar{r}_i} \right)}{\left( \sum_{i=1}^n c_i \right)} \quad \Gamma_s = \frac{\sum_{i=1}^n c_i \left( \frac{\bar{M}_i}{\bar{M}} \right)^2 f_i^1 f_i^2 \varepsilon \left( \frac{r_i^1 - r_i^2}{\bar{r}_i} \right)}{\left( \sum_{i=1}^n c_i \right)} \quad (5)$$

where  $\bar{M}_i$  is the average atomic mass of the  $i$  of sublattice, the  $\bar{M}$  is the average atomic mass of the compound,  $f_i$  is the fractional occupant,  $r_i$  is the radius of atom,  $\varepsilon$  is the phenomenological parameter which is a function of the Grüneisen parameter. The mass fluctuation term and the strain field term would be jointly determined by four or five parameters of  $\bar{M}_i, \bar{M}, f_i, r_i, \varepsilon$ , respectively.

For  $\text{Nb}_{1-x-y-z}\text{Ti}_x\text{Zr}_y\text{Hf}_z\text{FeSb}$  ( $x, y, z = 0, 0.05, 0.06, 0.07$ ) samples, the existing phonon scattering sources should be the  $U$  process, boundary, point defects and electron-phonon interaction. The boundary scattering and point defects scattering relaxation times can be calculated independently. Therefore, through fitting the  $\kappa_1$  of corresponding sample, the prefactor  $C$  of the  $EP$  scattering relaxation time can be obtained.

### Calculation of bulk modulus

The bulk modulus ( $K$ ) has been calculated using the following equations:

$$K = \frac{E}{3(1 - 2\nu_p)} \quad (6)$$

$$E = \frac{\rho v_a^2 (3v_l^2 - 4v_t^2)}{(v_l^2 - v_t^2)} \quad (7)$$

$$\nu_p = \frac{1 - 2(v_t/v_l)^2}{2 - 2(v_t/v_l)^2} \quad (8)$$

Where  $E$ ,  $\nu_p$ ,  $\nu_a$ ,  $\nu_l$  and  $\nu_t$  are the Young's modulus, Poisson's ratio, average sound

velocity, longitudinal sound velocity and transverse sound velocity, respectively.
